# Supplementary material
Source: publisher site journal article supplement (https://www.dovepress.com/article/364681)
Supplement: Supplementary file 1 [file get_supplementary_file.php]

## **Electronic Supplementary Material**

### **Patient Preference and Adherence**

#### **Development of an electronic tool to assess patient preferences in geriatric polypharmacy (PolyPref)**

Annette Eidam<sup>1</sup>, Anja Roth<sup>1</sup>, Eduard Frick<sup>2</sup>, Michael Metzner<sup>2</sup>, Anette Lampert<sup>2,3</sup>, Hanna M. Seidling<sup>2,3</sup>, Walter E. Haefeli<sup>2,3</sup>, Jürgen M. Bauer<sup>1,4</sup>

<sup>1</sup>Center for Geriatric Medicine, Heidelberg University, AGAPLESION Bethanien Hospital Heidelberg, Heidelberg, Germany

<sup>2</sup>Department of Clinical Pharmacology and Pharmacoepidemiology, Heidelberg University, Heidelberg, Germany

<sup>3</sup>Cooperation Unit Clinical Pharmacy, Heidelberg University, Heidelberg, Germany

<sup>4</sup>Network Aging Research (NAR), Heidelberg University, Heidelberg, Germany

#### **Correspondence:**

Dr. med. Annette Eidam

Center for Geriatric Medicine, Heidelberg University, AGAPLESION Bethanien Hospital Heidelberg, Heidelberg, Germany

Tel: +49 (0) 6221-319-1795

Fax: +49 (0) 6221-319-1505

Email: [Annette.Eidam@agaplesion.de](mailto:Annette.Eidam@agaplesion.de)

LUMIA

# 1. Nahrungsaufnahme und Verdauung

Wie sehr fühlen Sie sich beeinträchtigt durch...  
...eine Appetitlosigkeit?

|                          |                      |             |                |                     |
|--------------------------|----------------------|-------------|----------------|---------------------|
| Gar nicht beeinträchtigt | Wenig beeinträchtigt | Teils/teils | Beeinträchtigt | Sehr beeinträchtigt |
|--------------------------|----------------------|-------------|----------------|---------------------|



**Figure S1** Screenshot of PolyPref stage 1 – section 1 (short-term health outcomes): “Loss of appetite”. Respondents are asked to rate how strongly they are affected by this symptom (Not affected – Slightly affected – Partly affected – Affected – Very much affected).

LUMIA

### 3. Atmung und Atemwege

Wie sehr fühlen Sie sich beeinträchtigt durch...

...eine Luftnot bei körperlicher Belastung?

|                          |                      |             |                |                     |
|--------------------------|----------------------|-------------|----------------|---------------------|
| Gar nicht beeinträchtigt | Wenig beeinträchtigt | Teils/teils | Beeinträchtigt | Sehr beeinträchtigt |
|--------------------------|----------------------|-------------|----------------|---------------------|



A horizontal progress bar at the bottom of the screen shows the first button, 'Gar nicht beeinträchtigt', selected, indicated by a green fill. The rest of the bar is grey.

**Figure S2** Screenshot of PolyPref stage 1 – section 1 (short-term health outcomes): “Effort dyspnea”. Respondents are asked to rate how strongly they are affected by this symptom (Not affected – Slightly affected – Partly affected – Affected – Very much affected).

LUMIA

**Medikament C: Dieses Medikament kann helfen, eine dauerhafte Schwäche (z.B. am Herzen, an der Lunge oder an den Nieren) zu stabilisieren und die Häufigkeit von Krankenhausaufenthalten zu verringern.**

**Ich würde dieses Medikament...**

...nehmen, auch wenn es leichte Nebenwirkungen mit sich bringt.

...nur nehmen, wenn es keine Nebenwirkungen mit sich bringt.

...nicht nehmen.



A horizontal bar at the bottom of the screen is divided into two segments: a light green segment on the left and a dark grey segment on the right.

**Figure S3** Screenshot of PolyPref stage 1 – section 2 (long-term health outcomes): Example of a hypothetical medicine that may help to stabilize a chronic illness (eg, of the heart, lungs, or kidneys) and to reduce the number of hospitalizations. Respondents are asked if they are willing to take this medicine and if they are willing to accept mild adverse drug reactions for the benefit of prevention.

LUMIA

Ich empfinde es als störend, dass...  
...ich manche Tabletten für die Einnahme teilen muss.

trifft nicht zu    trifft eher nicht zu    unentschieden    trifft eher zu    trifft völlig zu



Progress bar: 20% (green) / 80% (grey)

**Figure S4** Screenshot of PolyPref stage 1 – section 3 (medication regimen characteristics): “Splitting of tablets”. Respondents are asked to rate how strongly they are bothered by this medication regimen characteristic on a 5-point Likert scale.

LUMIA

Anhand Ihrer Angaben ergibt sich folgendes Profil für Ihre Präferenzen bezüglich Ihrer Medikamente:

**Wichtigste Eigenschaft**

Eine Besserung meiner Appetitlosigkeit.

---

Eine Besserung meiner Schmerzen oder meiner unangenehmen Missempfindungen.

Schutz vor einer schweren Erkrankung in der Zukunft (z.B. einem Herzinfarkt, Schlaganfall oder Knochenbruch).

---

Eine Besserung meiner Magen-Darm-Beschwerden.

Eine Besserung meiner Gangunsicherheit und meiner Angst vor einem Sturz.

Die Stabilisierung einer chronischen Schwäche (z.B. am Herzen, an der Lunge oder an den Nieren) und eine Verringerung von Krankenhausaufenthalten in Zukunft.

Weniger Medikamente zu nehmen.

---

Besser schlafen zu können.

Seltener am Tag Medikamente zu nehmen.

---

**Unwichtigste Eigenschaft**

Meine Tabletten nicht mehr teilen zu müssen.

**Weiter**



**Figure S5** Screenshot of a final result of preference assessment with PolyPref. In this example, the respondent had selected 10 attributes of drug therapy during stage 1 that are relevant to him/her. After completing stage 2 of the preference task, these attributes are now listed from most important (“Wichtigste Eigenschaft”) to least important (“Unwichtigste Eigenschaft”) within five Q-sort importance categories with 1:2:4:2:1 attributes.
